# Supplementary material
Source: PubMed Central journal article supplement (PMC8026648)
Supplement: NIHMS1677650-supplement-1.pdf [file NIHMS1677650-supplement-1.pdf]

Supplemental Table 1

*Descriptive Statistics*

| Variable                       | Mean | Range | Intraclass<br>Correlation |
|--------------------------------|------|-------|---------------------------|
| Problematic Cannabis Use       | 8.07 | 0-36  | .69                       |
| CU with Sexual Minority Women  | .79  | 0-1   | .30                       |
| CU with Sexual Minority Men    | .44  | 0-1   | .32                       |
| CU with Non-Binary Individuals | .34  | 0-1   | .47                       |
| CU with Heterosexual Women     | .67  | 0-1   | .30                       |
| CU with Heterosexual Men       | .62  | 0-1   | .28                       |

Descriptive statistics are presented for the full analytic sample (i.e., both cisgender women and non-binary individuals). As cannabis use with sexual minority women, sexual minority men, non-binary individuals, and heterosexual men and women are binary variables coded as 0 (no use with this group) and 1 (use with this group), the means for these variables can be interpreted as the proportion of observations during which participants endorsed using with these groups. Problematic cannabis use was assessed using the CUDIT-R.
